# Supplementary material
Source: ML conference proceedings conference paper supplement (https://proceedings.neurips.cc/paper_files/paper/2012/hash/3cef96dcc9b8035d23f69e30bb19218a-Abstract.html)
Supplement: Supplementary file [file 3cef96dcc9b8035d23f69e30bb19218a-Supplemental.zip]

---

# Meta-Gaussian Information Bottleneck

---

## Supplementary Material

**Multi-information for meta-Gaussian random vectors.** In the following we compute the multi-information for a meta-Gaussian random vector  $Z = (Z_1, \dots, Z_d)$ .

$$\begin{aligned} I(Z) &= D_{kl}(f(z) \parallel f_0(z)) = \int_{[0,1]^d} c_Z(u) \log c_Z(u) du, \quad u = (u_1, \dots, u_d), \\ &= \int |P|^{-\frac{1}{2}} \exp \left\{ -\frac{1}{2} (\Phi^{-1}(u))^T (P^{-1} - I) \Phi^{-1}(u) \right\} \log \left[ |P|^{-\frac{1}{2}} \exp \left\{ -\frac{1}{2} (\Phi^{-1}(u))^T (P^{-1} - I) \Phi^{-1}(u) \right\} \right] du, \end{aligned}$$

where  $\Phi^{-1}(u) = (\Phi^{-1}(u_1), \dots, \Phi^{-1}(u_d))$ . We now use a change of variable  $g(\tilde{z}) = g(\tilde{z}_1, \dots, \tilde{z}_d) := (\Phi(\tilde{z}_1), \dots, \Phi(\tilde{z}_d)) = (u_1, \dots, u_d)$ . The Jacobian matrix of the transformation is diagonal with elements  $Dg(\tilde{z})_{jj} = \Phi'(\tilde{z}_j)$  and its determinant is  $\det(Dg) = 2\pi^{-d/2} \exp\{-\frac{1}{2}\tilde{z}^T I \tilde{z}\}$ .

$$I(Z) = \int_{-\infty}^{+\infty} |P|^{-\frac{1}{2}} \exp \left\{ -\frac{1}{2} \tilde{z}^T (P^{-1} - I) \tilde{z} \right\} \log \left[ |P|^{-\frac{1}{2}} \exp \left\{ -\frac{1}{2} \tilde{z}^T (P^{-1} - I) \tilde{z} \right\} \right] \det(Dg) d\tilde{z}, \quad (1)$$

$$= \int |P|^{-\frac{1}{2}} \exp \left\{ -\frac{1}{2} \tilde{z}^T P^{-1} \tilde{z} \right\} \exp \left\{ \frac{1}{2} \tilde{z}^T I \tilde{z} \right\} \left[ \log(|P|^{-\frac{1}{2}}) - \frac{1}{2} \tilde{z}^T (P^{-1} - I) \tilde{z} \right] 2\pi^{d/2} \exp\{-\frac{1}{2}\tilde{z}^T I \tilde{z}\} d\tilde{z}, \quad (2)$$

$$= \int 2\pi^{d/2} |P|^{-\frac{1}{2}} \exp \left\{ -\frac{1}{2} \tilde{z}^T P^{-1} \tilde{z} \right\} \left[ \log(|P|^{-\frac{1}{2}}) - \frac{1}{2} \tilde{z}^T (P^{-1} - I) \tilde{z} \right] d\tilde{z}, \quad (3)$$

$$= \mathbb{E}_{\mathcal{N}(0, P)} \left[ \log(|P|^{-\frac{1}{2}}) - \frac{1}{2} \tilde{z}^T (P^{-1} - I) \tilde{z} \right], \quad (4)$$

$$= \log(|P|^{-\frac{1}{2}}) - \frac{1}{2} \mathbb{E}_{\mathcal{N}(0, P)} [\tilde{z}^T P^{-1} \tilde{z}] + \frac{1}{2} \mathbb{E}_{\mathcal{N}(0, P)} [\tilde{z}^T I \tilde{z}], \quad (5)$$

$$= \log(|P|^{-\frac{1}{2}}) - \frac{1}{2} d + \frac{1}{2} d, \quad (6)$$

$$= \log(|P|^{-\frac{1}{2}}), \quad (7)$$

$$= -\frac{1}{2} \log |P|. \quad (8)$$
